# Supplementary material for: Global Characterization of GH10 Family Xylanase Genes in Rhizoctonia cerealis and Functional Analysis of Xylanase RcXYN1 During Fungus Infection in Wheat
Source: PubMed Central journal article supplement (PMC7084588; doi:10.3390/ijms21051812), 2020-03-06
Supplement: ijms-21-01812-s001.pdf [file ijms-21-01812-s001.pdf]

## Supporting information

Table S1 All primers used in this study.

| Primer Name       | Sequence (5'-3')                            |
|-------------------|---------------------------------------------|
| RcXYN1-F          | 5'-CCACCTTCACTATGCTCG-3'                    |
| RcXYN1-R          | 5'-TACGTGGTACACAATTCCT-3'                   |
| RcXYN2-F          | 5'-ACTCGATTCTGCTACCAT-3'                    |
| RcXYN2-R          | 5'-AGGGAGCAACACTCTGTA-3'                    |
| RcXYN3-F          | 5'-GGGGATGCCAGTTAGACG-3'                    |
| RcXYN3-R          | 5'-TGTGCTGCGACGGTATT-3'                     |
| RcXYN4-F          | 5'-GCTCTTCTAATGGTCTCGCC-3'                  |
| RcXYN4-R          | 5'-GCTGGTATCCCAAACCGTAAT-3'                 |
| RcXYN5-F          | 5'-ACATTGGCTGACTTGGAC-3'                    |
| RcXYN5-R          | 5'-TCCGAAAGCACAAATCTACAAA -3'               |
| RcXYN6-F          | 5'-ATAGAATGGTAGGGACAAGAC-3'                 |
| RcXYN6-R          | 5'-AACAGGCAAAGCATTACAG -3'                  |
| RcXYN7-F          | 5'-AACTCGCATCTAACTAGGACA-3'                 |
| RcXYN7-R          | 5'-ATTTACTAGAAATTGAAAGAA -3'                |
| RcXYN8-F          | 5'-CAACGGAGGACTAAATGC-3'                    |
| RcXYN8-R          | 5'-AAAGCATCATAGAGCCAATTC -3'                |
| RcXYN9-F          | 5'-GCCCAATGGTTTGTTC-3'                      |
| RcXYN9-R          | 5'-AGTAAATTCTCATCCGG-3'                     |
| pCOLD-TF-RcXYN1-F | 5'-ggtagcctcgaggatccATGCTCGCGCTCTCTGCTC-3'  |
| pCOLD-TF-RcXYN1-R | 5'-aagcttgaattcgatccTCATGCCCCCAAAGCCTTTC-3' |
| pCOLD-TF-RcXYN2-F | 5'-ggtagcctcgaggatccATGCGCTTTACTGTTGCCAC-3' |
| pCOLD-TF-RcXYN2-R | 5'-aagcttgaattcgatccTCAATTCAAAGCCGAGATGA-3' |
| TaActin-F         | 5'-CACTGGAATGGTCAAGGCTG-3'                  |
| TaActin-R         | 5'-CTCCATGTCATCCAGTTG-3'                    |
| RcActin-F         | 5'-GCATCCACGAGACCCTTAC-3'                   |
| RcActin-R         | 5'-GCGTCCCGCTGCTCAAGAT-3'                   |
| QRcXYN1-F         | 5'-CCACCGAGTCTTACAACATCCA-3'                |
| QRcXYN1-R         | 5'-CCACGCATCTTCTTCCCATTT-3'                 |
| QRcXYN2-F         | 5'-GGAGGCTTTGATACCTTGGTC-3'                 |
| QRcXYN2-R         | 5'-TGGCATTTCGTCAGAGC-3'                     |
| QRcXYN3-F         | 5'-TCTCAGACCGCGCTGGCACTC-3'                 |
| QRcXYN3-R         | 5'-CCTTGGGCTTGAAGTTTCGAGTCATA-3'            |
| QRcXYN4-F         | 5'-CCACGCTCATCTCAGTCTTC-3'                  |
| QRcXYN4-R         | 5'-TGGCAGTTGGGTCTACAGCAC-3'                 |
| QRcXYN5-F         | 5'-GGTGGTATCGGCTACAGTGGT-3'                 |
| QRcXYN5-R         | 5'-GACCGTCAAGTCCGCTACCTC-3'                 |
| QRcXYN6-F         | 5'-GTCGTAGTTCTCATGCCACAAGC-3'               |
| QRcXYN6-R         | 5'-CCGCCTCCAGGATTAGGGTTA-3'                 |
| QRcXYN7-F         | 5'-CGTCGCCATCCTCAAGTCTGA-3'                 |
| QRcXYN7-R         | 5'-CTGACTGTGCCAGATGAAGGTG-3'                |
| QRcXYN8-F         | 5'-CCTCAGTATGGCACAATGTTCT-3'                |
| QRcXYN8-R         | 5'-TGCATCTCCCCACTCAGGTGA-3'                 |
| QRcXYN9-F         | 5'-GCTGCTTGGGCTTCTGCT-3'                    |
| QRcXYN9-R         | 5'-TCGGACGGGTTCCAGTGAGG-3'                  |

**A**

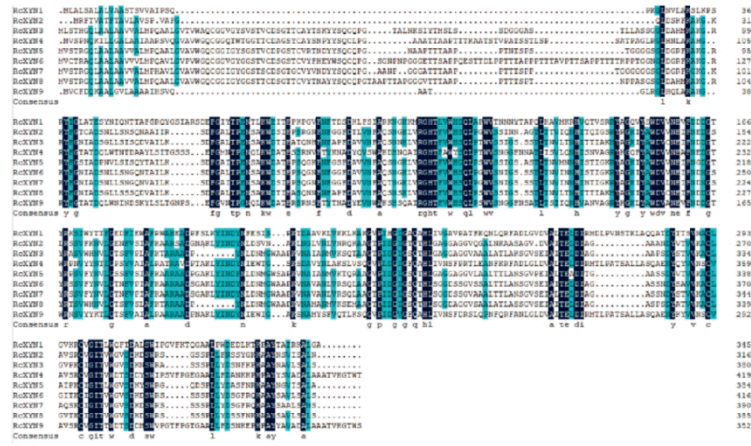

**B**

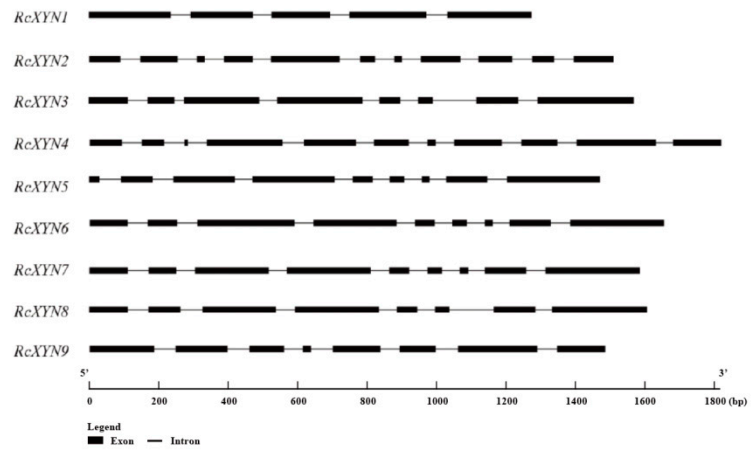

**Figure S1 Sequence alignment among *RcXYN* proteins in *Rhizoctonia cerealis* and structures of their coding genes. (A) Sequence alignment among nine *Rhizoctonia cerealis* xylanases proteins. (B) Exons and introns are indicated by black boxes and lines, respectively. The 5'-3' scale indicates the DNA sequence size. The names of the *RcXYN* genes and intron-exon structures are indicated at the left and right sides, respectively.**

**File S1 Amino acid sequences of the 53 GH10 family xylanases from *Rhizoctonia cerealis* and other fungi (*Rhizoctonia solani*, *Magnaporthe oryzae*, *Fusarium oxysporum*, *Aspergillus niger*, *Aureobasidium pullulans*, *Penicillium purpurogenum*, *Penicillium oxalicum*, *Talaromyces aerugineus*, *Aspergillus kawachii*, *Aspergillus fumigatus*, *Aspergillus sojae*, *Aspergillus terreus*, *Aspergillus aculeatus*, *Penicillium crysogenum*, *Penicillium citrinum*, *Penicillium simplicissimum*, *Penicillium canescens*, *Coprinopsis cinerea*).**
